# Supplementary material
Source: publisher site journal article supplement (https://www.dovepress.com/article/389824)
Supplement: Supplementary file 1 [file get_supplementary_file.php]

## S1: Cohort comparisons of all variables included in analyses

| Variables                                                                                                                                                        | NSCLC<br>(n = 105,676)       | Non-NSCLC LC<br>(n = 37,759) | Non-cancer<br>(n = 257,047) | Other Cancer<br>(n=69,820) |
|------------------------------------------------------------------------------------------------------------------------------------------------------------------|------------------------------|------------------------------|-----------------------------|----------------------------|
|                                                                                                                                                                  | Mean (SD) or Pct             | Mean (SD) or Pct             | Mean (SD) or Pct            | Mean (SD) or Pct           |
| Number (per patient) of unique days with lung cancer diagnosis codes (ICD-9-CM 162.2-162.9) in any Medicare claims                                               | 129.67 (142.06) <sup>b</sup> | 95.01 (128.87)               | 29.98 (77.46)               | 22.85 (65.04)              |
| Number (per patient) of unique days with inpatient lung cancer diagnosis codes (ICD-9-CM 162.2-162.9)                                                            | 19.46 (25.09) <sup>b</sup>   | 16.27 (22.59)                | 14.7 (32.76)                | 14.11 (31.98)              |
| Number (per patient) of unique days with other/non-lung cancer diagnosis codes on or pre-index (ICD-9-CM 140-162.0, 163.0-172.*, 174-196.*,197.1-209.3*, 209.7*) | 33.09 (87.64) <sup>b</sup>   | 29.92 (83.05)                | 13.26 (57.87)               | 61.12 (126.67)             |
| Abnormal chest sounds - pre index                                                                                                                                | 2.74% <sup>b</sup>           | 3.58%                        | 1.90%                       | 2.06%                      |
| Radiologic or other abnormal lung findings - post index                                                                                                          | 50.45% <sup>b</sup>          | 34.31%                       | 17.10%                      | 23.20%                     |
| Radiologic or other abnormal lung findings - pre index                                                                                                           | 40.81% <sup>b</sup>          | 35.66%                       | 10.40%                      | 13.64%                     |
| Bronchial stent -post index                                                                                                                                      | 0.26% <sup>b</sup>           | 0.16%                        | <sup>a</sup>                | <sup>a</sup>               |
| COPD (including emphysema and bronchitis) - post index                                                                                                           | 75.03% <sup>b</sup>          | 67.57%                       | 35.11%                      | 37.41%                     |
| COPD (including emphysema and bronchitis) - pre index                                                                                                            | 66.40% <sup>b</sup>          | 72.03%                       | 31.14%                      | 32.45%                     |
| Chest or head and neck mass or swelling - post index                                                                                                             | 78.37% <sup>b</sup>          | 67.83%                       | 37.76%                      | 45.26%                     |
| Chest pain - post index                                                                                                                                          | 56.22% <sup>b</sup>          | 40.83%                       | 46.25%                      | 49.82%                     |
| Chest pain - pre index                                                                                                                                           | 59.93% <sup>b</sup>          | 59.89%                       | 45.79%                      | 47.61%                     |
| Cough - post index                                                                                                                                               | 39.95% <sup>b</sup>          | 26.31%                       | 33.33%                      | 34.80%                     |
| Dysphagia - post index                                                                                                                                           | 19.10% <sup>b</sup>          | 15.41%                       | 17.28%                      | 18.91%                     |
| Enlargement of lymph nodes - pre index                                                                                                                           | 15.99% <sup>b</sup>          | 16.66%                       | 2.24%                       | 6.60%                      |
| Evidence of chemotherapy, biologics, or other targeted agent cancer drugs - post index                                                                           | 41.60% <sup>b</sup>          | 29.74%                       | 1.93%                       | 13.65%                     |
| Evidence of chemotherapy, biologics, or other targeted agent cancer drugs - pre index                                                                            | 3.92% <sup>b</sup>           | 3.80%                        | 1.00%                       | 9.51%                      |
| Evidence of receiving cyclophosphamide, doxorubicin, irinotecan, vincristine or topotecan - post index                                                           | 1.00% <sup>b</sup>           | 7.78%                        | 0.10%                       | 2.88%                      |

| Variables                                                                                             | NSCLC<br>(n = 105,676) | Non-NSCLC LC<br>(n = 37,759) | Non-cancer<br>(n = 257,047) | Other Cancer<br>(n=69,820) |
|-------------------------------------------------------------------------------------------------------|------------------------|------------------------------|-----------------------------|----------------------------|
|                                                                                                       | Mean (SD) or Pct       | Mean (SD) or Pct             | Mean (SD) or Pct            | Mean (SD) or Pct           |
| Evidence of receiving cyclophosphamide, doxorubicin, irinotecan, vincristine or topotecan - pre index | 0.54% <sup>b</sup>     | 0.40%                        | 0.05%                       | 2.53%                      |
| Evidence of radiotherapy - post index                                                                 | 46.16% <sup>b</sup>    | 29.98%                       | 0.75%                       | 11.38%                     |
| Fatigue - post index                                                                                  | 54.52% <sup>b</sup>    | 44.06%                       | 50.49%                      | 56.37%                     |
| Fatigue - pre index                                                                                   | 51.08% <sup>b</sup>    | 56.58%                       | 45.02%                      | 47.03%                     |
| History of tobacco use - post index                                                                   | 51.17% <sup>b</sup>    | 36.21%                       | 16.23%                      | 20.33%                     |
| History of tobacco use - pre index                                                                    | 46.21% <sup>b</sup>    | 48.96%                       | 12.45%                      | 15.80%                     |
| LC days 2                                                                                             | 97.57% <sup>b</sup>    | 91.84%                       | 0.84%                       | 3.78%                      |
| LC days 30                                                                                            | 77.94% <sup>b</sup>    | 54.99%                       | 0.28%                       | 1.01%                      |
| LC days 4                                                                                             | 96.60% <sup>b</sup>    | 87.92%                       | 0.65%                       | 2.72%                      |
| Lung biopsy greater than 60 days post                                                                 | 15.83% <sup>b</sup>    | 5.62%                        | 1.93%                       | 3.63%                      |
| Lung biopsy - pre index                                                                               | 34.76% <sup>b</sup>    | 21.75%                       | 1.21%                       | 2.27%                      |
| Lung fibrosis - post index                                                                            | 13.37% <sup>b</sup>    | 8.63%                        | 5.44%                       | 6.59%                      |
| Lung fibrosis - pre index                                                                             | 11.28%                 | 12.07%                       | 4.29%                       | 5.21%                      |
| Lung resections - post index                                                                          | 23.24% <sup>b</sup>    | 2.16%                        | 0.14%                       | 0.35%                      |
| Lung resections - pre index                                                                           | 3.87% <sup>b</sup>     | 0.74%                        | 0.10%                       | 0.27%                      |
| Non-chest pain - post index                                                                           | 73.32% <sup>b</sup>    | 59.48%                       | 78.87%                      | 82.32%                     |
| Non-chest pain - pre index                                                                            | 82.52% <sup>b</sup>    | 82.98%                       | 77.05%                      | 79.61%                     |
| Other LC diagnostic procedures - pre index                                                            | 22.89% <sup>b</sup>    | 23.60%                       | 9.99%                       | 11.64%                     |
| Other possibly related respiratory symptoms or conditions - pre index                                 | 55.79% <sup>b</sup>    | 46.91%                       | 14.45%                      | 20.28%                     |
| Home oxygen or supplemental oxygen - pre index                                                        | 14.68% <sup>b</sup>    | 21.64%                       | 5.69%                       | 5.85%                      |
| PET scan - pre index                                                                                  | 25.66% <sup>b</sup>    | 13.11%                       | 0.84%                       | 6.27%                      |
| Pleurisy, pleural effusion, or empyema - pre index                                                    | 25.72% <sup>b</sup>    | 29.09%                       | 9.05%                       | 12.47%                     |
| Pneumonia - post index                                                                                | 53.42% <sup>b</sup>    | 47.36%                       | 25.08%                      | 29.28%                     |
| Other pneumonitis - post index                                                                        | 6.89% <sup>b</sup>     | 5.75%                        | 6.22%                       | 7.06%                      |

| Variables                                                                                      | NSCLC<br>(n = 105,676) | Non-NSCLC LC<br>(n = 37,759) | Non-cancer<br>(n = 257,047) | Other Cancer<br>(n=69,820) |
|------------------------------------------------------------------------------------------------|------------------------|------------------------------|-----------------------------|----------------------------|
|                                                                                                | Mean (SD) or Pct       | Mean (SD) or Pct             | Mean (SD) or Pct            | Mean (SD) or Pct           |
| Other pneumonitis - pre index                                                                  | 2.68% <sup>b</sup>     | 4.38%                        | 2.11%                       | 2.07%                      |
| Pulmonary collapse (including pneumothorax) - post index                                       | 49.40%                 | 26.81%                       | 15.06%                      | 21.14%                     |
| Pulmonary collapse (including pneumothorax) - pre index                                        | 24.81% <sup>b</sup>    | 22.66%                       | 9.26%                       | 12.76%                     |
| Spirometry - post index                                                                        | 38.98% <sup>b</sup>    | 15.74%                       | 13.27%                      | 14.26%                     |
| Spirometry - pre index                                                                         | 41.70% <sup>b</sup>    | 32.88%                       | 14.31%                      | 15.55%                     |
| Cachexia and weight loss - pre index                                                           | 18.85% <sup>b</sup>    | 23.13%                       | 10.41%                      | 11.79%                     |
| Diabetes without chronic complications                                                         | 33.51% <sup>b</sup>    | 33.16%                       | 31.49%                      | 31.87%                     |
| Moderate or severe liver disease                                                               | 1.96% <sup>b</sup>     | 3.74%                        | 1.10%                       | 1.65%                      |
| Diabetes with chronic complications                                                            | 19.19% <sup>b</sup>    | 19.09%                       | 19.67%                      | 19.07%                     |
| Dementia                                                                                       | 6.00% <sup>†</sup>     | 13.26%                       | 11.42%                      | 8.83%                      |
| Cerebrovascular disease                                                                        | 31.58% <sup>†</sup>    | 35.44%                       | 21.17%                      | 20.81%                     |
| Rheumatic disease                                                                              | 6.44%                  | 6.04%                        | 5.29%                       | 4.82%                      |
| Type of other cancer codes pre-index (using cancer code groupers)                              | 44.88% <sup>b</sup>    | 49.70%                       | 53.86%                      | 63.79%                     |
| Patients with at least 2 LC diagnosis codes (ICD-9-CM: 162.2-162.9)                            | 89.06% <sup>b</sup>    | 81.62%                       | 0.26%                       | 0.77%                      |
| Patients with LC diagnosis codes (ICD-9-CM: 162.2-162.9) at least 30 days apart                | 82.21% <sup>b</sup>    | 63.86%                       | 0.26%                       | 0.77%                      |
| Patients with LC diagnosis codes (ICD-9-CM: 162.2-162.9) at least 60 days apart                | 75.65% <sup>b</sup>    | 55.44%                       | 0.26%                       | 0.76%                      |
| 162.3 Malignant neoplasm of upper lobe, bronchus, or lung                                      | 60.50% <sup>b</sup>    | 38.16%                       | 0.28%                       | 0.73%                      |
| 162.4 Malignant neoplasm of middle lobe, bronchus, or lung                                     | 13.37% <sup>b</sup>    | 8.51%                        | 0.05%                       | 0.18%                      |
| 162.5 Malignant neoplasm of lower lobe, bronchus, or lung                                      | 39.26% <sup>b</sup>    | 21.48%                       | 0.18%                       | 0.53%                      |
| 162.8 Malignant neoplasm of other parts of bronchus, or lung                                   | 41.11% <sup>b</sup>    | 29.77%                       | 0.17%                       | 0.70%                      |
| 162.9 Malignant neoplasm of bronchus and lung, unspecified                                     | 97.30% <sup>b</sup>    | 90.59%                       | 1.20%                       | 5.54%                      |
| 165.8 Malignant neoplasm of other sites within the respiratory system and intrathoracic organs | 0.28% <sup>b</sup>     | 0.26%                        | <sup>a</sup>                | <sup>a</sup>               |
| 197.0 Secondary malignant neoplasm of lung                                                     | 28.55% <sup>b</sup>    | 21.50%                       | 0.28%                       | 5.81%                      |

| Variables                                                                                                                                                | NSCLC<br>(n = 105,676) | Non-NSCLC LC<br>(n = 37,759) | Non-cancer<br>(n = 257,047) | Other Cancer<br>(n=69,820) |
|----------------------------------------------------------------------------------------------------------------------------------------------------------|------------------------|------------------------------|-----------------------------|----------------------------|
|                                                                                                                                                          | Mean (SD) or Pct       | Mean (SD) or Pct             | Mean (SD) or Pct            | Mean (SD) or Pct           |
| 212.3 Benign neoplasm of bronchus and lung                                                                                                               | 8.44% <sup>b</sup>     | 5.77%                        | 0.41%                       | 0.65%                      |
| 231.2 Carcinoma in situ of bronchus and lung                                                                                                             | 16.23% <sup>b</sup>    | 10.52%                       | 0.08%                       | 0.31%                      |
| V10.20 Personal history of malignant neoplasm of unspecified respiratory organ                                                                           | 0.58% <sup>b</sup>     | 0.24%                        | 0.00%                       | 0.05%                      |
| V10.29 Personal history of malignant neoplasm of other respiratory and intrathoracic organs                                                              | 0.26% <sup>b</sup>     | 0.16%                        | 0.01%                       | 0.14%                      |
| Presence of any malignant neoplasm code (ICD-9-CM 140-172.*, 174-209.3*, 209.7*)                                                                         | 98.92% <sup>b</sup>    | 96.98%                       | 16.14%                      | 88.55%                     |
| Presence of ICD-9-CM codes 162.2-162.9 on inpatient claim                                                                                                | 82.99% <sup>b</sup>    | 73.30%                       | 0.39%                       | 1.03%                      |
| Presence of other cancer (not LC; ICD-9-CM 140-162.0, 163.0-172.*, 174-196.*, 197.1-209.3*, 209.7*) diagnosis code on or post-index in Medicare          | 75.97% <sup>b</sup>    | 65.16%                       | 9.66%                       | 76.73%                     |
| Presence of other cancer (not LC; ICD-9-CM 140-162.0, 163.0-172.*, 174-196.*, 197.1-209.3*, 209.7*) diagnosis code pre-index in Medicare                 | 40.79% <sup>b</sup>    | 40.54%                       | 8.66%                       | 62.74%                     |
| Diagnostic radiology                                                                                                                                     | 45.41% <sup>b</sup>    | 44.18%                       | 49.19%                      | 46.64%                     |
| Hematology                                                                                                                                               | 2.98% <sup>b</sup>     | 2.29%                        | 0.45%                       | 2.12%                      |
| Hematology/oncology                                                                                                                                      | 33.27% <sup>b</sup>    | 24.34%                       | 4.86%                       | 20.09%                     |
| Thoracic surgery                                                                                                                                         | 16.14% <sup>b</sup>    | 7.24%                        | 3.52%                       | 3.94%                      |
| Charlson Comorbidity Index in the 12 months prior to index                                                                                               | 3.05 (2.23)            | 3.45 (2.33)                  | 2.01 (2.21)                 | 2.07 (2.19)                |
| Number of other cancer diagnosis codes post-index                                                                                                        | 31.55 (79)             | 24.5 (62.95)                 | 22.29 (70.34)               | 67.05 (124.01)             |
| Number of other cancer diagnosis codes pre-index                                                                                                         | 34.21 (92.91)          | 30.8 (91.78)                 | 12.57 (53.77)               | 55.63 (110.07)             |
| Number of other cancer diagnosis codes pre-and post-index                                                                                                | 26.41 (89.53)          | 17.98 (70.84)                | 3.06 (30.31)                | 85.52 (154.6)              |
| Number (per patient) of unique days with outpatient LC diagnosis codes (ICD-9-CM 162.2-162.9)                                                            | 32.93 (55.46)          | 31.72 (55.14)                | 12.77 (32.74)               | 7.91 (21.29)               |
| Number (per patient) of unique days with other/non-LC diagnosis codes on or post-index (ICD-9-CM 140-162.0, 163.0-172.*,174-196.*, 197.1-209.3*, 209.7*) | 57.67 (101.91)         | 51.43 (89.63)                | 24.11 (77.83)               | 77.66 (147.63)             |
| Evidence of airway obstruction -post index                                                                                                               | 76.53%                 | 68.65%                       | 39.49%                      | 41.58%                     |

| Variables                                                   | NSCLC<br>(n = 105,676) | Non-NSCLC LC<br>(n = 37,759) | Non-cancer<br>(n = 257,047) | Other Cancer<br>(n=69,820) |
|-------------------------------------------------------------|------------------------|------------------------------|-----------------------------|----------------------------|
|                                                             | Mean (SD) or Pct       | Mean (SD) or Pct             | Mean (SD) or Pct            | Mean (SD) or Pct           |
| Evidence of airway obstruction -pre index                   | 69.25%                 | 73.90%                       | 35.72%                      | 36.88%                     |
| Bronchial stent -pre index                                  | 0.03%                  | a                            | a                           | a                          |
| Brochospasm -post index                                     | 2.13%                  | 1.15%                        | 1.66%                       | 1.56%                      |
| Brochospasm -pre index                                      | 1.54%                  | 1.59%                        | 0.76%                       | 0.69%                      |
| Current reason for entitlement to Medicare at index year    |                        |                              |                             |                            |
| Old age and survivors insurance (age)                       | 99.75%                 | 99.83%                       | 98.08%                      | 98.06%                     |
| Disability insurance benefits                               | 0.12%                  | 0.06%                        | 1.78%                       | 1.80%                      |
| End-stage renal disease                                     | 0.12%                  | 0.10%                        | 0.10%                       | 0.11%                      |
| Disability insurance benefits/end-stage renal disease       | a                      | a                            | 0.04%                       | 0.02%                      |
| Chest or head and neck mass or swelling -pre index          | 70.09%                 | 66.50%                       | 31.58%                      | 36.48%                     |
| Cough -pre index                                            | 48.38%                 | 47.32%                       | 29.95%                      | 31.21%                     |
| Diagnostic radiology -post index                            | 93.93%                 | 84.19%                       | 69.39%                      | 80.25%                     |
| Diagnostic radiology -pre index                             | 91.09%                 | 90.01%                       | 64.10%                      | 73.47%                     |
| Dysphagia -pre index                                        | 12.14%                 | 15.28%                       | 10.96%                      | 11.35%                     |
| Evidence of radiotherapy -pre index                         | 6.00%                  | 5.05%                        | 0.44%                       | 10.49%                     |
| Family history of respiratory malignant neoplasm-post index | 2.94%                  | 1.31%                        | 0.21%                       | 0.47%                      |
| Family history of respiratory malignant neoplasm-pre index  | 0.70%                  | 0.54%                        | 0.11%                       | 0.32%                      |
| Abnormal sputum, including hemoptysis -post index           | 4.44%                  | 2.58%                        | 1.25%                       | 1.42%                      |
| Abnormal sputum, including hemoptysis -pre index            | 2.24%                  | 2.02%                        | 0.51%                       | 0.51%                      |
| LungBiopsy0_59                                              | 43.41%                 | 25.86%                       | 0.14%                       | 0.27%                      |
| Medicare status code at index                               |                        |                              |                             |                            |
| Aged                                                        | 99.22%                 | 99.30%                       | 99.51%                      | 97.88%                     |
| Aged with end-stage renal disease                           | 0.66%                  | 0.66%                        | 0.11%                       | 0.36%                      |
| Disabled                                                    | 0.12%                  | 0.04%                        | 0.35%                       | 1.73%                      |
| Disabled with end-stage renal disease                       | a                      | a                            | 0.01%                       | a                          |
| End-stage renal disease only                                | a                      | a                            | 0.02%                       | 0.02%                      |

| Variables                                                             | NSCLC<br>(n = 105,676) | Non-NSCLC LC<br>(n = 37,759) | Non-cancer<br>(n = 257,047) | Other Cancer<br>(n=69,820) |
|-----------------------------------------------------------------------|------------------------|------------------------------|-----------------------------|----------------------------|
|                                                                       | Mean (SD) or Pct       | Mean (SD) or Pct             | Mean (SD) or Pct            | Mean (SD) or Pct           |
| Other LC diagnostic procedures -post index                            | 23.22%                 | 12.76%                       | 10.83%                      | 11.73%                     |
| Other possibly related respiratory symptoms or conditions -post index | 64.74%                 | 45.98%                       | 21.66%                      | 30.35%                     |
| Home oxygen or supplemental oxygen -post index                        | 34.76%                 | 29.12%                       | 9.61%                       | 10.94%                     |
| Physician management -post index                                      | 96.29%                 | 87.89%                       | 84.19%                      | 91.21%                     |
| Physician management -pre index                                       | 94.75%                 | 93.73%                       | 82.30%                      | 88.38%                     |
| Pneumonia -pre index                                                  | 37.48%                 | 44.35%                       | 17.03%                      | 18.67%                     |
| Respiratory failure -post index                                       | 35.02%                 | 28.87%                       | 14.33%                      | 16.92%                     |
| Respiratory failure -pre index                                        | 13.99%                 | 19.33%                       | 5.89%                       | 6.33%                      |
| Personal history of other respiratory diseases -post index            | 0.81%                  | 0.39%                        | 0.39%                       | 0.46%                      |
| Personal history of other respiratory diseases -pre index             | 0.49%                  | 0.49%                        | 0.19%                       | 0.17%                      |
| Shortness of breath including wheezing -post index                    | 75.73%                 | 61.66%                       | 47.83%                      | 53.27%                     |
| Shortness of breath including wheezing -pre index                     | 64.01%                 | 66.84%                       | 39.63%                      | 42.51%                     |
| Tuberculosis -post index                                              | 1.02%                  | 0.61%                        | 0.44%                       | 0.55%                      |
| Tuberculosis -pre index                                               | 1.20%                  | 1.02%                        | 0.57%                       | 0.52%                      |
| Cachexia and weight loss -post index                                  | 21.72%                 | 18.09%                       | 13.35%                      | 17.66%                     |
| Myocardial infarction                                                 | 13.07%                 | 14.45%                       | 6.63%                       | 7.53%                      |
| Hemiplegia or paraplegia                                              | 6.17%                  | 9.07%                        | 4.73%                       | 4.20%                      |
| Renal disease                                                         | 30.82%                 | 36.97%                       | 22.03%                      | 25.33%                     |
| AIDS/HIV                                                              | 0.91%                  | 0.80%                        | 0.57%                       | 0.66%                      |
| Congestive heart failure                                              | 28.63%                 | 36.87%                       | 20.26%                      | 20.80%                     |
| Peripheral vascular disease                                           | 34.66%                 | 37.61%                       | 22.14%                      | 22.75%                     |
| Peptic ulcer disease                                                  | 4.55%                  | 5.00%                        | 2.85%                       | 3.18%                      |
| Mild liver disease                                                    | 14.62%                 | 17.76%                       | 4.88%                       | 7.79%                      |
| Evidence of a primary payer other than Medicare                       |                        |                              |                             |                            |
| No                                                                    | 90.95%                 | 92.34%                       | 94.76%                      | 94.73%                     |

| Variables                                                                              | NSCLC<br>(n = 105,676) | Non-NSCLC LC<br>(n = 37,759) | Non-cancer<br>(n = 257,047) | Other Cancer<br>(n=69,820) |
|----------------------------------------------------------------------------------------|------------------------|------------------------------|-----------------------------|----------------------------|
|                                                                                        | Mean (SD) or Pct       | Mean (SD) or Pct             | Mean (SD) or Pct            | Mean (SD) or Pct           |
| Yes                                                                                    | 9.05%                  | 7.66%                        | 5.24%                       | 5.27%                      |
| Type of other cancer codes post-index (using cancer code groupers)                     | 77.21%                 | 68.38%                       | 60.01%                      | 78.97%                     |
| 162.0 Malignant neoplasm of trachea                                                    | 4.11%                  | 2.70%                        | 0.02%                       | 0.14%                      |
| 165.0 Malignant neoplasm of upper respiratory tract, part unspecified                  | 0.18%                  | 0.11%                        | a                           | 0.02%                      |
| 165.9 Malignant neoplasm of ill-defined sites within the respiratory system            | 0.79%                  | 0.57%                        | 0.01%                       | 0.04%                      |
| 197.3 Secondary malignant neoplasm of other respiratory organs                         | 0.78%                  | 0.50%                        | 0.01%                       | 0.23%                      |
| 212.8 Benign neoplasm of other specified sites of respiratory and intrathoracic organs | 0.04%                  | 0.04%                        | a                           | a                          |
| 212.9 Benign neoplasm of respiratory and intrathoracic organs, site unspecified        | 0.10%                  | 0.09%                        | 0.02%                       | 0.03%                      |
| 231.8 Carcinoma in situ of other specified parts of respiratory system                 | 0.32%                  | 0.26%                        | 0.01%                       | 0.05%                      |
| 231.9 Carcinoma in situ of respiratory system, part unspecified                        | 1.03%                  | 0.73%                        | 0.01%                       | 0.05%                      |
| 235.7 Neoplasm of uncertain behavior of trachea, bronchus, and lung                    | 19.34%                 | 13.66%                       | 0.50%                       | 1.10%                      |
| 235.9 Neoplasm of uncertain behavior of other and unspecified respiratory organs       | 0.45%                  | 0.29%                        | 0.11%                       | 0.19%                      |
| 239.1 Neoplasm of unspecified nature of respiratory system                             | 28.35%                 | 20.80%                       | 0.58%                       | 1.81%                      |
| Interventional radiology                                                               | 13.80%                 | 10.73%                       | 8.97%                       | 10.51%                     |
| Medical oncology                                                                       | 14.81%                 | 10.33%                       | 1.57%                       | 9.04%                      |
| Pulmonary disease                                                                      | 37.56%                 | 31.52%                       | 16.01%                      | 17.38%                     |
| Radiation oncology                                                                     | 25.51%                 | 17.35%                       | 3.04%                       | 14.26%                     |
| Radiation therapy centers                                                              | 0.34%                  | 0.20%                        | 0.01%                       | 0.13%                      |
| Surgical oncology                                                                      | 1.28%                  | 0.66%                        | 0.62%                       | 2.08%                      |
| Urban vs. rural                                                                        |                        |                              |                             |                            |

| Variables                     | NSCLC<br>(n = 105,676) | Non-NSCLC LC<br>(n = 37,759) | Non-cancer<br>(n = 257,047) | Other Cancer<br>(n=69,820) |
|-------------------------------|------------------------|------------------------------|-----------------------------|----------------------------|
|                               | Mean (SD) or Pct       | Mean (SD) or Pct             | Mean (SD) or Pct            | Mean (SD) or Pct           |
| Big metro (urban = 00 or 01)  | 53.48%                 | 48.25%                       | 52.22%                      | 55.15%                     |
| Metro (urban = 02 or 03)      | 29.30%                 | 29.18%                       | 30.05%                      | 28.80%                     |
| Urban (urban = 04 or 05)      | 5.87%                  | 7.39%                        | 6.13%                       | 5.94%                      |
| Less urban (urban = 06 or 07) | 9.19%                  | 12.31%                       | 9.40%                       | 8.24%                      |
| Rural (urban = 08 or 09)      | 2.15%                  | 2.87%                        | 2.20%                       | 1.86%                      |

Abbreviations: AIDS/HIV = acquired immunodeficiency syndrome/ human immunodeficiency virus; COPD = chronic obstructive pulmonary disease; ICD-9-CM = International Classification of Diseases, Ninth Revision, Clinical Modification; LC = lung cancer; NSCLC = non-small cell lung cancer; PET = positron emission tomography.

<sup>a</sup> Percentages suppressed to conform with CMS cell size policy

<sup>b</sup> Selected by variable reduction methods to best discriminate NSCLC vs. non-NSCLC LC/non-cancer/other cancer

The \* indicates include all codes in this range



**S2: Performance results for logistic regression after variable selection (method II, A, 1 from Table 2) and 10-variable score (method II, B, 1 from Table 2) in model building and validation subsets, using different cut points (after re-categorizing high-probability lung cancer cases)**

|                                                                            | Model Building Subset |            |              |              |            |            |         | Testing Models with the Validation Subset |            |              |              |            |            |         |
|----------------------------------------------------------------------------|-----------------------|------------|--------------|--------------|------------|------------|---------|-------------------------------------------|------------|--------------|--------------|------------|------------|---------|
|                                                                            | Specificity           |            |              |              |            |            |         | Specificity                               |            |              |              |            |            |         |
|                                                                            | NSCLC Sens            | Non-cancer | Other Cancer | Non-NSCLC LC | Bayes' PPV | Bayes' NPV | F-score | NSCLC Sens                                | Non-cancer | Other Cancer | Non-NSCLC LC | Bayes' PPV | Bayes' NPV | F-score |
| <b>Models based on LC positive score subgroup applied to entire sample</b> |                       |            |              |              |            |            |         |                                           |            |              |              |            |            |         |
| <b>Points score</b>                                                        |                       |            |              |              |            |            |         |                                           |            |              |              |            |            |         |
| NSCLC $\geq 1$                                                             | 82.51                 | 99.93      | 99.66        | 37.46        | 61.75      | 99.95      | 70.64   | 82.83                                     | 99.94      | 99.70        | 37.77        | 62.52      | 99.95      | 71.26   |
| NSCLC $\geq 3$                                                             | 81.53                 | 99.94      | 99.68        | 43.10        | 63.16      | 99.95      | 71.18   | 81.91                                     | 99.94      | 99.72        | 43.27        | 64.20      | 99.95      | 71.99   |
| NSCLC $\geq 4$                                                             | 79.71                 | 99.95      | 99.73        | 49.99        | 66.01      | 99.94      | 72.22   | 80.05                                     | 99.94      | 99.75        | 50.35        | 65.88      | 99.94      | 72.28   |
| NSCLC $\geq 5$                                                             | 77.34                 | 99.95      | 99.78        | 55.22        | 68.37      | 99.93      | 72.58   | 77.69                                     | 99.95      | 99.79        | 55.57        | 67.61      | 99.93      | 72.30   |
| NSCLC $\geq 6$                                                             | 74.89                 | 99.96      | 99.81        | 59.14        | 70.04      | 99.93      | 72.38   | 75.21                                     | 99.95      | 99.81        | 59.24        | 69.19      | 99.93      | 72.07   |
| NSCLC $\geq 7$                                                             | 70.65                 | 99.96      | 99.83        | 65.22        | 71.66      | 99.91      | 71.15   | 70.86                                     | 99.96      | 99.84        | 65.09        | 71.78      | 99.91      | 71.32   |
| NSCLC $\geq 10$                                                            | 40.64                 | 99.99      | 99.94        | 90.40        | 80.88      | 99.82      | 54.10   | 41.08                                     | 99.98      | 99.93        | 90.21        | 79.57      | 99.83      | 54.19   |
| <b>Non-interaction logistic model</b>                                      |                       |            |              |              |            |            |         |                                           |            |              |              |            |            |         |
| Probability of NSCLC $\geq 50.0\%$ cutoff                                  | 95.22                 | 35.16      | 29.03        | 36.88        | 69.55      | 82.41      | 80.38   | 95.30                                     | 26.44      | 21.62        | 36.49        | 67.99      | 80.34      | 79.36   |
| Probability of NSCLC $\geq 60.0\%$ cutoff                                  | 92.10                 | 47.25      | 38.71        | 45.31        | 72.35      | 78.53      | 81.04   | 92.24                                     | 39.08      | 33.33        | 44.42        | 70.74      | 76.96      | 80.07   |
| Probability of NSCLC                                                       | 89.95                 | 52.75      | 49.19        | 49.80        | 74.09      | 76.45      | 81.26   | 90.21                                     | 42.53      | 37.84        | 48.93        | 71.74      | 74.45      | 79.92   |

|                                    | Model Building Subset |            |              |              |            |            |         | Testing Models with the Validation Subset |            |              |              |            |            |         |
|------------------------------------|-----------------------|------------|--------------|--------------|------------|------------|---------|-------------------------------------------|------------|--------------|--------------|------------|------------|---------|
|                                    | Specificity           |            |              |              |            |            |         | Specificity                               |            |              |              |            |            |         |
|                                    | NSCLC Sens            | Non-cancer | Other Cancer | Non-NSCLC LC | Bayes' PPV | Bayes' NPV | F-score | NSCLC Sens                                | Non-cancer | Other Cancer | Non-NSCLC LC | Bayes' PPV | Bayes' NPV | F-score |
| ≥65.0% cutoff                      |                       |            |              |              |            |            |         |                                           |            |              |              |            |            |         |
| Probability of NSCLC ≥67.0% cutoff | 88.85                 | 57.14      | 50.81        | 51.95        | 75.05      | 75.61      | 81.37   | 89.13                                     | 43.68      | 41.44        | 50.98        | 72.21      | 73.25      | 79.78   |
| Probability of NSCLC ≥70.0% cutoff | 86.95                 | 57.14      | 53.23        | 55.03        | 75.35      | 73.19      | 80.73   | 87.21                                     | 48.28      | 45.95        | 54.54        | 73.37      | 71.72      | 79.70   |
| Probability of NSCLC ≥75.0% cutoff | 82.61                 | 59.34      | 58.87        | 61.38        | 76.39      | 68.91      | 79.38   | 83.02                                     | 54.02      | 54.95        | 60.71        | 75.10      | 68.28      | 78.86   |
| Probability of NSCLC ≥90.0% cutoff | 43.04                 | 91.21      | 90.32        | 91.99        | 88.65      | 50.70      | 57.95   | 43.05                                     | 90.80      | 88.29        | 91.64        | 87.92      | 50.53      | 57.80   |

Abbreviations: LC = lung cancer; NPV = negative predictive value; NSCLC = non-small cell lung cancer; PPV = positive predictive value; Sens = Sensitivity; Spec = Specificity.

### S3: Logistic regression after variable selection (method II, A, 1 from Table 2)

| Variable                                                                                             | Regression Estimate | Standard Error | p-value |
|------------------------------------------------------------------------------------------------------|---------------------|----------------|---------|
| Intercept                                                                                            | 3.8669              | 43.5458        | 0.9292  |
| Urban vs. rural                                                                                      |                     |                |         |
| Big metro (urban = 00 or 01)                                                                         | 0.1574              | 0.0239         | <.0001  |
| Metro (urban = 02 or 03)                                                                             | 0.1162              | 0.0256         | <.0001  |
| Urban (urban = 04 or 05)                                                                             | -0.0267             | 0.0397         | 0.5017  |
| Less urban (urban = 06 or 07)                                                                        | -0.1544             | 0.033          | <.0001  |
| Race/ethnicity                                                                                       |                     |                |         |
| Unknown                                                                                              | 0.0362              | 0.3402         | 0.9152  |
| White                                                                                                | -0.1697             | 0.0703         | 0.0157  |
| Black                                                                                                | 0.0745              | 0.0777         | 0.3373  |
| Other                                                                                                | 0.0707              | 0.1154         | 0.54    |
| Asian                                                                                                | 0.098               | 0.0951         | 0.3026  |
| Hispanic                                                                                             | 0.1014              | 0.1195         | 0.3964  |
| Medicare status code at index                                                                        |                     |                |         |
| Aged                                                                                                 | -4.3172             | 43.545         | 0.921   |
| Aged with end-stage renal disease                                                                    | -3.9626             | 43.5451        | 0.9275  |
| Disabled                                                                                             | -3.5239             | 43.5472        | 0.9355  |
| Disabled with end-stage renal disease                                                                | 5.8269              | 117.7          | 0.9605  |
| No evidence of a primary payer other than Medicare                                                   | -0.0424             | 0.0224         | 0.0588  |
| Evidence of receiving cyclophosphamide, doxorubicin, irinotecan, vincristine or topotecan-post index | -3.08               | 0.0689         | <.0001  |
| PET scan -post index                                                                                 | 0.6326              | 0.0293         | <.0001  |
| Lung resections -post index                                                                          | 1.6753              | 0.0625         | <.0001  |
| Presence of ICD-9-CM codes 162.2-162.9 on outpatient claim                                           | 0.3735              | 0.0316         | <.0001  |
| Lung biopsy -pre index                                                                               | 0.8014              | 0.0291         | <.0001  |

| <b>Variable</b>                                                                       | <b>Regression Estimate</b> | <b>Standard Error</b> | <b>p-value</b> |
|---------------------------------------------------------------------------------------|----------------------------|-----------------------|----------------|
| Lung biopsy -post index                                                               | 0.6867                     | 0.0304                | <.0001         |
| ≥10 days of lung cancer codes                                                         | 0.4819                     | 0.0597                | <.0001         |
| Lung resections -pre index                                                            | 1.3267                     | 0.1057                | <.0001         |
| Physician management -post index                                                      | 0.5615                     | 0.0601                | <.0001         |
| COPD (including emphysema and bronchitis) -pre index                                  | -0.1172                    | 0.0363                | 0.0012         |
| 162.3 malignant neoplasm of upper lobe, bronchus or lung                              | 0.295                      | 0.0256                | <.0001         |
| 162.5 malignant neoplasm of lower lobe, bronchus or lung                              | 0.3209                     | 0.0269                | <.0001         |
| Gender (male=1; female=2)                                                             | -0.2694                    | 0.024                 | <.0001         |
| 162.2 malignant neoplasm of main bronchus                                             | -0.3015                    | 0.0309                | <.0001         |
| History of tobacco use -pre index                                                     | -0.1932                    | 0.0258                | <.0001         |
| Pleurisy, pleural effusion, or empyema -post index                                    | 0.2242                     | 0.0264                | <.0001         |
| Enlargement of lymph nodes -post index                                                | -0.207                     | 0.0286                | <.0001         |
| Lung biopsy greater than 60 days post                                                 | -0.2948                    | 0.0477                | <.0001         |
| PET scan -pre index                                                                   | 0.2083                     | 0.0344                | <.0001         |
| Home oxygen or supplemental oxygen -pre index                                         | -0.1649                    | 0.0325                | <.0001         |
| Dementia                                                                              | -0.181                     | 0.0431                | <.0001         |
| Pulmonary collapse (including pneumothorax)-post index                                | 0.1913                     | 0.0273                | <.0001         |
| Evidence of chemotherapy, biologics, or other targeted agent cancer drugs -post index | -0.2914                    | 0.0315                | <.0001         |
| Evidence of radiotherapy -post index                                                  | 0.1728                     | 0.0283                | <.0001         |
| Chest or head and neck mass or swelling -post index                                   | -0.2054                    | 0.0319                | <.0001         |
| 197.0 secondary malignant neoplasm of lung                                            | 0.208                      | 0.0278                | <.0001         |
| Spirometry -post index                                                                | 0.2554                     | 0.0315                | <.0001         |
| COPD (including emphysema and bronchitis) -post index                                 | -0.1335                    | 0.0341                | <.0001         |
| Charlson Comorbidity Index                                                            | -0.0349                    | 0.00732               | <.0001         |
| ≥30 days of lung cancer codes                                                         | 0.1858                     | 0.0344                | <.0001         |
| Fatigue -post index                                                                   | -0.0913                    | 0.0258                | 0.0004         |
| Specialist: hematology/oncology                                                       | 0.2417                     | 0.039                 | <.0001         |

| Variable                                                                                                           | Regression Estimate | Standard Error | p-value |
|--------------------------------------------------------------------------------------------------------------------|---------------------|----------------|---------|
| Specialist: diagnostic radiology                                                                                   | -0.1615             | 0.0364         | <.0001  |
| Spirometry -pre index                                                                                              | 0.1244              | 0.0276         | <.0001  |
| Other lung cancer diagnostic procedures -pre index                                                                 | -0.1496             | 0.0294         | <.0001  |
| Number (per patient) of unique days with lung cancer diagnosis codes (ICD-9-CM 162.2-162.9) in any Medicare claims | -0.00041            | 0.000103       | <.0001  |
| Pleurisy, pleural effusion, or empyema -pre index                                                                  | 0.1003              | 0.0288         | 0.0005  |
| Enlargement of lymph nodes -pre index                                                                              | -0.122              | 0.032          | 0.0001  |
| Age (in years)                                                                                                     | -0.00538            | 0.00191        | 0.0048  |
| Specialist: thoracic surgery                                                                                       | 0.141               | 0.0438         | 0.0013  |
| 212.3 benign neoplasm of bronchus and lung                                                                         | -0.1722             | 0.0451         | 0.0001  |
| Mild liver disease                                                                                                 | -0.07               | 0.0332         | 0.035   |
| Evidence of chemotherapy, biologics, or other targeted agent cancer drugs -pre index                               | -0.233              | 0.0608         | 0.0001  |
| Number of other cancer diagnosis codes post-index                                                                  | 0.00123             | 0.000333       | 0.0002  |
| History of tobacco use -post index                                                                                 | -0.0908             | 0.0269         | 0.0008  |
| Other possibly related respiratory symptoms or conditions -pre index                                               | 0.0968              | 0.0269         | 0.0003  |
| Other pneumonitis -pre index                                                                                       | -0.138              | 0.0662         | 0.0371  |
| Diagnostic radiology -post index                                                                                   | -0.1067             | 0.0487         | 0.0285  |
| Chronic pulmonary disease                                                                                          | -0.1208             | 0.0415         | 0.0036  |
| Dysphagia -post index                                                                                              | -0.0694             | 0.0321         | 0.0305  |
| 231.2 carcinoma in situ of bronchus and lung                                                                       | 0.1036              | 0.0341         | 0.0024  |
| Lung fibrosis -post index                                                                                          | -0.1218             | 0.0396         | 0.0021  |
| 162.9 malignant neoplasm of bronchus and lung, unspecified                                                         | 0.3489              | 0.1647         | 0.0341  |
| ≥4 days of lung cancer codes                                                                                       | 0.2055              | 0.1303         | 0.1148  |
| 165.8 malignant neoplasm of other sites within the respiratory system and intrathoracic organs                     | -0.5287             | 0.2152         | 0.014   |
| Other pneumonitis -post index                                                                                      | -0.1222             | 0.0486         | 0.0119  |
| Diabetes with chronic complications                                                                                | 0.0455              | 0.0236         | 0.0533  |
| Chest pain -post index                                                                                             | -0.0569             | 0.0258         | 0.0272  |

| <b>Variable</b>                                                             | <b>Regression Estimate</b> | <b>Standard Error</b> | <b>p-value</b> |
|-----------------------------------------------------------------------------|----------------------------|-----------------------|----------------|
| Respiratory failure -pre index                                              | -0.0664                    | 0.0341                | 0.0517         |
| Rheumatic disease                                                           | 0.085                      | 0.0481                | 0.0771         |
| Patients with at least 2 lung cancer diagnosis codes(ICD-9-CM: 162.2-162.9) | 0.0978                     | 0.0644                | 0.1292         |
| Abnormal sputum, including hemoptysis -pre index                            | 0.1314                     | 0.0782                | 0.0928         |

Abbreviations: COPD = chronic obstructive pulmonary disease; ESRD = end-stage renal disease; ICD-9-CM = International Classification of Diseases, Ninth Revision, Clinical Modification; PET = positron emission tomography
